# Supplementary material for: Identification of FCN1 as a novel macrophage infiltration-associated biomarker for diagnosis of pediatric inflammatory bowel diseases
Source: J Transl Med. 2023 Mar 17;21:203. doi: 10.1186/s12967-023-04038-1 (PMC10022188; doi:10.1186/s12967-023-04038-1)
Supplement: Supplementary file 1 — Additional file 1: Table S1. Differentially expressed genes of GSE117993. [file 12967_2023_4038_MOESM1_ESM.xlsx]

## Sheet: Table S1 Differentially express
Table S1 Differentially expressed genes of GSE117993
Gene	baseMean	log2FoldChange	lfcSE	stat	pvalue	padj	change
ABCA12	0.436297	2.06455	0.555297	3.71791	0.000200876	0.000834486	Up
AC103563.4	0.741629	2.60703	0.54041	4.82417	1.40584e-06	9.24731e-06	Up
AC133644.2	1.55391	2.17198	0.301443	7.20527	5.79278e-13	1.14955e-11	Up
ACKR4	0.86995	2.60829	0.407319	6.40356	1.51799e-10	2.07403e-09	Up
ADAMTS4	1.90289	2.08163	0.454164	4.58343	4.57407e-06	2.72254e-05	Up
ADGRE1	0.875735	2.47496	0.348346	7.1049	1.20414e-12	2.26279e-11	Up
ADGRE2	2.84736	2.03298	0.266243	7.63583	2.24367e-14	5.49159e-13	Up
ADGRE3	0.594262	2.4894	0.473146	5.26137	1.42989e-07	1.13839e-06	Up
ADGRF1	2.83196	2.58616	0.329792	7.84179	4.44156e-15	1.21107e-13	Up
ADGRG3	2.64995	4.47572	0.416909	10.7355	6.93482e-27	9.64351e-25	Up
AGT	7.26814	2.56459	0.244262	10.4994	8.69756e-26	1.05341e-23	Up
ALDH1A2	6.11853	2.73451	0.273008	10.0162	1.29352e-23	1.23894e-21	Up
ALDOB	16.3163	2.66824	0.376224	7.09217	1.32026e-12	2.45886e-11	Up
ALPL	5.78885	3.11952	0.300464	10.3823	2.98361e-25	3.45749e-23	Up
ANGPT2	0.83865	2.63834	0.371791	7.09631	1.28135e-12	2.38945e-11	Up
APOBEC1	2.26135	2.64623	0.341371	7.75176	9.06251e-15	2.38269e-13	Up
APOBEC3A	3.85486	2.90032	0.391422	7.40971	1.2658e-13	2.7728e-12	Up
AQP8	265.197	-2.21857	0.402757	-5.50845	3.62001e-08	3.2516e-07	Down
AQP9	5.97041	5.71418	0.544319	10.4979	8.83625e-26	1.06335e-23	Up
BCL2A1	17.4742	2.44727	0.229999	10.6403	1.93404e-26	2.50398e-24	Up
BMP3	1.81936	-2.54458	0.382166	-6.65832	2.76971e-11	4.2515e-10	Down
C2CD4A	1.79708	3.80468	0.393859	9.66001	4.45812e-22	3.51648e-20	Up
C2CD4B	2.77181	2.05538	0.26703	7.69719	1.39094e-14	3.5097e-13	Up
C4BPA	6.00824	5.40019	0.472853	11.4204	3.30575e-30	6.74553e-28	Up
C4BPB	13.6702	3.69685	0.260375	14.1982	9.401e-46	8.40404e-43	Up
C6orf223	1.25113	2.83849	0.360463	7.87456	3.41943e-15	9.52418e-14	Up
CASP5	40.3084	2.44675	0.175779	13.9194	4.82643e-44	3.93942e-41	Up
CCL11	13.5274	2.62162	0.231582	11.3205	1.03909e-29	1.97039e-27	Up
CD274	4.3307	2.73753	0.282458	9.69181	3.26683e-22	2.62087e-20	Up
CD300E	1.34661	3.54727	0.602912	5.88356	4.01523e-09	4.30485e-08	Up
CD55	80.7369	2.4526	0.183881	13.338	1.39153e-40	7.91613e-38	Up
CD80	0.785123	2.21221	0.355332	6.22576	4.79214e-10	6.06219e-09	Up
CDH3	4.57206	2.88549	0.302594	9.53585	1.4866e-21	1.09443e-19	Up
CDKN2B-AS	1.06068	-2.17108	0.810799	-2.6777	0.00741294	0.0197479	Down
CEACAM4	0.688539	2.5675	0.426775	6.01605	1.78728e-09	2.0434e-08	Up
CEMIP	3.50536	2.66641	0.378533	7.04406	1.86712e-12	3.41299e-11	Up
CETP	1.31187	2.0842	0.364814	5.71307	1.10959e-08	1.10038e-07	Up
CFB	79.1712	2.59684	0.160194	16.2106	4.24524e-59	6.64133e-56	Up
CH17-212P11.5	27.051	2.93212	0.428131	6.84865	7.45523e-12	1.25522e-10	Up
CH17-224D4.2	172.033	2.18437	0.318948	6.84867	7.4538e-12	1.25522e-10	Up
CHAC1	3.6564	2.66432	0.282875	9.41875	4.56486e-21	3.11623e-19	Up
CHI3L1	63.026	5.76077	0.344706	16.7121	1.06926e-62	2.23035e-59	Up
CHI3L2	12.2503	2.04076	0.233872	8.72595	2.63946e-18	1.23877e-16	Up
CHRDL2	5.57209	3.71901	0.339001	10.9705	5.29661e-28	8.15027e-26	Up
CHRNA1	0.673517	-2.00631	0.374954	-5.35081	8.75635e-08	7.25432e-07	Down
CLDN1	1.27657	3.36422	0.405905	8.28819	1.14982e-16	4.18326e-15	Up
CLDN2	3.00393	4.55255	0.437287	10.4109	2.2111e-25	2.59431e-23	Up
CLEC12A	1.77796	2.11554	0.30482	6.94028	3.91314e-12	6.80828e-11	Up
CLEC4D	0.655575	2.62664	0.791073	3.32036	0.000899022	0.00315464	Up
CLEC4E	6.56528	4.03823	0.386767	10.441	1.61108e-25	1.90219e-23	Up
CMTM2	1.97094	4.15996	0.5781	7.19592	6.20402e-13	1.21829e-11	Up
CNTFR	1.14414	-2.70699	0.351345	-7.70465	1.31202e-14	3.32396e-13	Down
COL23A1	0.716146	2.40835	0.342383	7.03409	2.00566e-12	3.64142e-11	Up
CPXM1	4.2324	2.35963	0.235559	10.0171	1.28178e-23	1.23399e-21	Up
CPZ	2.14664	3.29867	0.343861	9.59304	8.55249e-22	6.58016e-20	Up
CSF2	0.517264	2.23212	0.533908	4.18073	2.90576e-05	0.000146482	Up
CSF3	3.14807	4.7297	0.576511	8.20401	2.32508e-16	8.05328e-15	Up
CSF3R	17.6868	3.41728	0.266982	12.7996	1.6471e-37	7.36216e-35	Up
CTA-384D8.34	1.85938	2.15554	0.330938	6.51343	7.34517e-11	1.05745e-09	Up
CTA-384D8.35	1.70319	2.51163	0.324015	7.75159	9.07487e-15	2.38269e-13	Up
CTB-61M7.2	1.01064	3.25379	0.684001	4.757	1.9649e-06	1.25723e-05	Up
CTC-251I16.1	1.62423	2.4709	0.344987	7.16229	7.93429e-13	1.53241e-11	Up
CTC-518B2.12	2.54679	2.76773	0.569697	4.85825	1.18429e-06	7.94873e-06	Up
CTD-3214H19.16	5.50766	2.41631	0.556534	4.34171	1.41377e-05	7.57872e-05	Up
CTHRC1	3.15788	2.13616	0.262293	8.14419	3.81828e-16	1.28001e-14	Up
CXCL1	138.66	3.69641	0.211301	17.4936	1.60303e-68	1.00312e-64	Up
CXCL10	25.1357	2.94111	0.261422	11.2504	2.30466e-29	4.08164e-27	Up
CXCL11	4.9088	3.57563	0.462144	7.73705	1.01752e-14	2.66043e-13	Up
CXCL17	0.926447	3.13269	0.741425	4.22523	2.38697e-05	0.000122333	Up
CXCL2	25.0738	2.70597	0.224031	12.0785	1.37141e-33	4.2554e-31	Up
CXCL3	46.5522	2.95348	0.206576	14.2973	2.27607e-46	2.24888e-43	Up
CXCL5	12.4235	6.40193	0.459513	13.932	4.04897e-44	3.45506e-41	Up
CXCL6	8.9156	5.07097	0.389046	13.0344	7.80134e-39	3.95823e-36	Up
CXCL8	45.9018	5.10623	0.368935	13.8404	1.45315e-43	1.13667e-40	Up
CXCL9	24.3723	2.42345	0.304028	7.97112	1.57247e-15	4.69315e-14	Up
CXCR1	2.64176	4.58703	0.577127	7.94805	1.89475e-15	5.52331e-14	Up
CXCR2	2.71689	4.51864	0.515405	8.76715	1.83243e-18	8.95839e-17	Up
CXCR2P1	1.9883	3.10334	0.330586	9.38739	6.15039e-21	4.1384e-19	Up
CYP27B1	0.815076	2.44253	0.401449	6.0843	1.17003e-09	1.38493e-08	Up
CYP2B7P	0.551202	-2.11934	0.429099	-4.93906	7.85021e-07	5.44813e-06	Down
CYP4X1	0.58092	2.34425	0.34783	6.73966	1.58758e-11	2.51719e-10	Up
DEFA5	53.1846	3.06602	0.40881	7.49986	6.38869e-14	1.45729e-12	Up
DEFA6	17.3389	2.61861	0.354316	7.3906	1.46165e-13	3.16853e-12	Up
DEFB4A	28.7524	7.93365	0.553388	14.3365	1.29397e-46	1.34954e-43	Up
DEFB4B	4.27416	5.17521	0.924397	5.59847	2.16254e-08	2.03394e-07	Up
DIO3	0.620897	-2.44254	0.367822	-6.64056	3.12484e-11	4.76545e-10	Down
DMBT1	91.5039	3.63278	0.300396	12.0933	1.14616e-33	3.64694e-31	Up
DOC2B	2.7684	2.67352	0.299222	8.93491	4.07499e-19	2.15492e-17	Up
DPP10	1.05827	-2.59043	0.280503	-9.23496	2.58393e-20	1.59566e-18	Down
DPP10-AS1	4.13201	-2.58998	0.229247	-11.2977	1.3465e-29	2.52778e-27	Down
DUOX2	83.4587	4.76525	0.27444	17.3635	1.55873e-67	7.31552e-64	Up
DUOXA1	0.714582	2.71708	0.341415	7.9583	1.74418e-15	5.14026e-14	Up
DUOXA2	89.0913	6.00201	0.341981	17.5507	5.87097e-69	5.51079e-65	Up
DYSF	3.23442	2.03296	0.237208	8.57035	1.03167e-17	4.51457e-16	Up
EDN2	1.16667	-2.65582	0.362777	-7.32078	2.4653e-13	5.12525e-12	Down
ENKUR	1.48905	3.58638	0.392502	9.13722	6.4077e-20	3.79469e-18	Up
F2RL2	1.07002	2.11141	0.383392	5.50718	3.64619e-08	3.27198e-07	Up
FAIM2	1.94866	2.22529	0.279911	7.94999	1.86534e-15	5.45451e-14	Up
FAM132B	0.581943	2.162	0.614622	3.51762	0.000435441	0.00166115	Up
FAM151A	1.82916	-2.10518	0.29169	-7.21719	5.30732e-13	1.05769e-11	Down
FAM25G	1.19939	2.41481	0.538658	4.48302	7.35945e-06	4.21066e-05	Up
FAM3B	3.3761	4.27347	0.451482	9.46543	2.92359e-21	2.0556e-19	Up
FAM92B	0.71546	2.66546	0.47799	5.57639	2.45561e-08	2.281e-07	Up
FAP	2.16228	2.34985	0.337564	6.96122	3.37347e-12	5.92425e-11	Up
FCAR	1.23876	3.55443	0.647222	5.49183	3.97785e-08	3.54083e-07	Up
FCGR1B	2.56128	2.65925	0.360128	7.38418	1.53399e-13	3.31388e-12	Up
FCGR1C	0.472984	2.02117	0.65471	3.08712	0.00202108	0.00639525	Up
FCGR3A	18.2474	2.45188	0.198505	12.3517	4.76691e-35	1.72095e-32	Up
FCGR3B	9.59926	5.86712	0.454087	12.9207	3.44068e-38	1.6562e-35	Up
FCN1	6.56729	3.81394	0.314065	12.1438	6.189e-34	2.03835e-31	Up
FCN3	1.22767	3.41911	0.424537	8.05373	8.03079e-16	2.57273e-14	Up
FFAR2	6.19319	2.9129	0.296811	9.81398	9.80273e-23	8.40304e-21	Up
FGR	9.05164	2.11707	0.192844	10.9782	4.86672e-28	7.55066e-26	Up
FIBIN	1.53467	3.26821	0.373564	8.74873	2.1576e-18	1.04394e-16	Up
FJX1	0.821415	2.37379	0.376235	6.30932	2.80257e-10	3.67151e-09	Up
FOXH1	0.700643	-2.06373	0.534173	-3.86342	0.000111812	0.000494243	Down
FOXP3	1.43187	2.52823	0.305732	8.26942	1.34612e-16	4.86913e-15	Up
FPR1	10.4374	4.50747	0.373953	12.0536	1.85726e-33	5.53434e-31	Up
FPR2	3.66816	4.95336	0.557253	8.88889	6.17239e-19	3.20095e-17	Up
G0S2	32.1742	2.53705	0.273057	9.29129	1.52426e-20	9.83333e-19	Up
GAL	1.1201	2.51935	0.397293	6.34129	2.27844e-10	3.02712e-09	Up
GAS1	0.846451	2.94389	1.08173	2.72146	0.00649944	0.0176576	Up
GBP1	35.9252	2.02685	0.184133	11.0075	3.51476e-28	5.59175e-26	Up
GBP1P1	0.694503	2.2826	0.395045	5.77808	7.55574e-09	7.76801e-08	Up
GBP5	15.4816	2.3977	0.212456	11.2856	1.54558e-29	2.8728e-27	Up
GJA5	0.549565	2.33095	0.420678	5.54093	3.00876e-08	2.74458e-07	Up
GLRA2	0.851947	-2.27467	0.365811	-6.21815	5.03044e-10	6.32529e-09	Down
GLYATL1	0.472457	2.08783	0.500302	4.17313	3.00437e-05	0.000151007	Up
GPR4	0.648994	2.36514	0.406513	5.81812	5.95134e-09	6.19659e-08	Up
GPR84	1.08038	3.16748	0.492875	6.42652	1.30554e-10	1.80213e-09	Up
GZMB	5.87898	2.34382	0.271503	8.63276	5.98867e-18	2.71559e-16	Up
H19	3.26413	2.65615	0.350659	7.57474	3.59836e-14	8.5293e-13	Up
HAPLN3	7.60968	2.0529	0.201056	10.2106	1.77805e-24	1.88584e-22	Up
HCAR2	3.16454	4.63365	0.558437	8.29753	1.06297e-16	3.88991e-15	Up
HCAR3	6.49253	5.78343	0.644457	8.97411	2.85644e-19	1.54536e-17	Up
HK3	5.00836	2.33558	0.22928	10.1866	2.27646e-24	2.38748e-22	Up
HMGCS2	113.726	-2.37867	0.272859	-8.71759	2.84195e-18	1.32716e-16	Down
HP	0.533648	2.01499	0.598826	3.3649	0.000765701	0.00274427	Up
HS3ST6	0.588353	-2.91431	0.65202	-4.46967	7.83416e-06	4.44591e-05	Down
HSD11B1	1.8433	2.21761	0.361377	6.13657	8.43233e-10	1.02261e-08	Up
IDO1	36.0648	3.37875	0.277101	12.1932	3.37917e-34	1.17476e-31	Up
IGFBP5	30.675	2.07106	0.17575	11.7841	4.71281e-32	1.17965e-29	Up
IGHG1	8912.65	3.56592	0.259994	13.7154	8.21205e-43	5.92941e-40	Up
IGHG2	1375.33	2.45941	0.25403	9.68155	3.61205e-22	2.87326e-20	Up
IGHG3	1349.05	3.67921	0.272516	13.5009	1.54456e-41	9.99863e-39	Up
IGHG4	492.911	2.42303	0.281888	8.59572	8.27435e-18	3.67221e-16	Up
IGHGP	523.186	3.44672	0.276576	12.4621	1.20149e-35	4.42265e-33	Up
IGHV1-14	2.97355	2.07845	0.373515	5.56456	2.62809e-08	2.42324e-07	Up
IGHV1-17	1.03414	2.28243	0.437099	5.22176	1.77234e-07	1.39039e-06	Up
IGHV1-24	179.317	3.45737	0.253325	13.648	2.07587e-42	1.3918e-39	Up
IGHV1-45	5.75109	2.53359	0.318761	7.94825	1.89166e-15	5.52289e-14	Up
IGHV1-46	183.302	2.10742	0.192599	10.942	7.26044e-28	1.0992e-25	Up
IGHV1-58	30.4416	2.28697	0.235871	9.69583	3.14077e-22	2.53055e-20	Up
IGHV1-67	4.02486	2.33308	0.323942	7.20214	5.92736e-13	1.17502e-11	Up
IGHV1-68	2.12773	2.16927	0.406908	5.3311	9.76171e-08	8.02701e-07	Up
IGHV1-69	179.112	2.4077	0.27893	8.63194	6.03179e-18	2.72855e-16	Up
IGHV1-69-2	659.974	2.70363	0.243754	11.0916	1.37727e-28	2.26803e-26	Up
IGHV1OR15-4	16.9926	2.19795	0.244063	9.00569	2.14317e-19	1.18334e-17	Up
IGHV1OR15-6	0.657823	2.10198	0.609923	3.4463	0.000568323	0.00209603	Up
IGHV1OR15-9	9.51168	2.14446	0.225519	9.50898	1.92547e-21	1.39055e-19	Up
IGHV1OR16-1	8.22799	2.40832	0.290306	8.2958	1.07857e-16	3.93928e-15	Up
IGHV1OR21-1	1.54491	2.54896	0.431696	5.90453	3.53647e-09	3.84203e-08	Up
IGHV2-26	105.852	2.6655	0.227978	11.6919	1.40228e-31	3.29062e-29	Up
IGHV2-70	214.917	2.84738	0.261531	10.8874	1.32414e-27	1.946e-25	Up
IGHV3-15	558.393	2.00778	0.174489	11.5067	1.22131e-30	2.60541e-28	Up
IGHV3-16	2.58361	2.73503	0.383477	7.13219	9.87825e-13	1.87887e-11	Up
IGHV3-20	98.38	2.11201	0.220023	9.59903	8.06976e-22	6.23431e-20	Up
IGHV3-36	0.661686	2.15962	0.595356	3.62744	0.000286245	0.00114188	Up
IGHV3-43	180.055	2.17667	0.203017	10.7216	8.05769e-27	1.11226e-24	Up
IGHV3-49	186.208	2.11648	0.206504	10.2491	1.19437e-24	1.28861e-22	Up
IGHV3OR16-13	16.3966	2.39917	0.240088	9.99287	1.63763e-23	1.52195e-21	Up
IGHV3OR16-6	1.3985	2.39931	0.431567	5.55954	2.70486e-08	2.48792e-07	Up
IGHV4-34	534.27	3.13707	0.235041	13.3469	1.23466e-40	7.24318e-38	Up
IGHV7-34-1	2.25489	2.11281	0.336987	6.26972	3.61707e-10	4.67653e-09	Up
IGHV7-81	16.8253	2.05075	0.262059	7.82555	5.05461e-15	1.37125e-13	Up
IGKV1-33	877.371	2.27273	0.205373	11.0664	1.82627e-28	2.98126e-26	Up
IGKV1D-32	1.0007	2.58888	0.476612	5.43184	5.57773e-08	4.80105e-07	Up
IGKV1D-33	311.429	2.12578	0.183201	11.6035	3.95341e-31	9.0509e-29	Up
IGKV1OR-2	2.5398	2.37497	0.389132	6.10325	1.03933e-09	1.24674e-08	Up
IGKV1OR2-11	1.56974	2.27358	0.373961	6.07973	1.20387e-09	1.41783e-08	Up
IGKV1OR2-3	4.91123	2.02089	0.273948	7.37691	1.62009e-13	3.48385e-12	Up
IGKV1OR2-9	1.56974	2.27358	0.373961	6.07973	1.20387e-09	1.41783e-08	Up
IGKV2D-23	0.8239	2.02361	0.576203	3.51197	0.000444793	0.00169167	Up
IGKV2D-26	3.14571	2.1498	0.320884	6.69963	2.08954e-11	3.26347e-10	Up
IGKV2D-40	64.226	2.70588	0.288363	9.38359	6.37628e-21	4.25986e-19	Up
IGKV3-15	1094.37	2.08638	0.171949	12.1338	6.99641e-34	2.26454e-31	Up
IGKV3D-15	227.401	2.06115	0.180696	11.4067	3.87114e-30	7.73116e-28	Up
IGLJ2	573.339	2.06863	0.17682	11.699	1.28898e-31	3.06305e-29	Up
IGLV1-36	58.3314	2.0033	0.246544	8.12553	4.45399e-16	1.47527e-14	Up
IGLV1-40	889.689	2.0326	0.176353	11.5257	9.78851e-31	2.13674e-28	Up
IGLV1-41	44.1039	2.2074	0.382528	5.77055	7.90109e-09	8.07883e-08	Up
IGLV1-44	712.411	2.0081	0.183453	10.9462	6.93074e-28	1.05781e-25	Up
IGLV3-21	377.116	2.17047	0.209778	10.3465	4.33963e-25	4.82058e-23	Up
IGLV3-22	1.0926	2.48405	0.447699	5.54849	2.88153e-08	2.63878e-07	Up
IGLV3-32	0.737791	2.04236	0.445261	4.58688	4.4992e-06	2.67968e-05	Up
IGLVI-70	3.72968	3.21089	0.41916	7.66031	1.85482e-14	4.60864e-13	Up
IL11	2.0677	4.0642	0.682073	5.9586	2.54415e-09	2.82778e-08	Up
IL13RA2	2.83154	3.37163	0.474001	7.11312	1.13451e-12	2.13408e-11	Up
IL17A	0.727676	2.79027	0.553033	5.04541	4.52556e-07	3.28278e-06	Up
IL17REL	0.744076	2.18941	0.451633	4.84777	1.24859e-06	8.31787e-06	Up
IL19	0.77218	2.80298	0.559616	5.00876	5.47818e-07	3.92826e-06	Up
IL1A	1.25768	3.45409	0.483253	7.14758	8.83224e-13	1.69711e-11	Up
IL1B	41.3415	3.2887	0.284296	11.5679	5.99484e-31	1.33978e-28	Up
IL1RN	23.4933	3.48769	0.29463	11.8375	2.49784e-32	6.51278e-30	Up
IL23A	1.82861	3.35805	0.36925	9.09425	9.52429e-20	5.45121e-18	Up
IL2RA	4.75962	2.04506	0.247636	8.25834	1.4771e-16	5.28184e-15	Up
IL6	4.23328	4.28175	0.485867	8.81259	1.22292e-18	6.10581e-17	Up
INHBA	0.978255	3.21431	0.613101	5.2427	1.5824e-07	1.2508e-06	Up
ITLN2	1.63152	3.21779	0.519877	6.18952	6.03493e-10	7.48307e-09	Up
KCND3	2.24941	3.64665	0.306282	11.9062	1.09889e-32	3.03373e-30	Up
KCNJ15	1.33016	3.65629	0.569977	6.4148	1.41007e-10	1.93503e-09	Up
KCNJ8	0.909649	2.31179	0.32826	7.04257	1.88725e-12	3.44644e-11	Up
KCNN3	2.29074	2.41964	0.288632	8.38313	5.15406e-17	1.97464e-15	Up
KIF5C	1.38039	-2.3523	0.277533	-8.47573	2.33601e-17	9.6171e-16	Down
KLK10	2.51666	3.84016	0.665211	5.77284	7.79448e-09	7.98722e-08	Up
KLK12	1.97407	2.21342	0.332591	6.65507	2.83165e-11	4.33593e-10	Up
KRT17	1.79172	3.65934	0.529595	6.9097	4.85694e-12	8.37275e-11	Up
KRT6A	0.50639	2.18626	0.894373	2.44446	0.0145069	0.0351268	Up
KRT6B	0.813015	2.88561	0.654107	4.41152	1.02647e-05	5.67802e-05	Up
KYNU	5.51165	2.55851	0.249752	10.2442	1.25661e-24	1.34802e-22	Up
L1TD1	2.74762	2.15583	0.256009	8.42093	3.73495e-17	1.46076e-15	Up
LAMP5	0.815586	2.26576	0.351817	6.44017	1.19342e-10	1.66202e-09	Up
LAX1	4.51488	2.03956	0.211534	9.64175	5.3274e-22	4.18457e-20	Up
LCN15	2.65707	-2.25424	0.398566	-5.65589	1.55043e-08	1.49724e-07	Down
LCN2	1174.43	3.69052	0.215027	17.1631	5.0185e-66	1.5702e-62	Up
LILRA1	1.14819	3.24859	0.428026	7.58971	3.20627e-14	7.67747e-13	Up
LILRA2	1.87639	2.34665	0.357674	6.56086	5.34971e-11	7.86587e-10	Up
LILRA5	5.95939	3.43856	0.322409	10.6652	1.48035e-26	1.95708e-24	Up
LILRA6	1.68813	2.94231	0.394834	7.45201	9.19315e-14	2.05212e-12	Up
LILRB3	8.09403	2.19064	0.224569	9.75483	1.75902e-22	1.48081e-20	Up
LINC00114	0.664093	2.31818	0.356856	6.49613	8.24113e-11	1.17561e-09	Up
LINC01272	3.01264	2.46168	0.338335	7.27587	3.442e-13	7.06966e-12	Up
LINC01389	1.1547	-2.09224	0.293936	-7.11803	1.09483e-12	2.06566e-11	Down
LINC01506	0.596114	2.17888	0.622898	3.49798	0.000468805	0.00177116	Up
LINC01558	0.753807	-2.11767	0.297235	-7.12456	1.04416e-12	1.978e-11	Down
LPL	0.861328	2.19067	0.360317	6.07984	1.20305e-09	1.41783e-08	Up
LRRN2	5.11909	-2.27682	0.238272	-9.55553	1.22959e-21	9.12372e-20	Down
LUCAT1	0.491555	2.09005	0.575777	3.62997	0.000283452	0.00113266	Up
LY6D	0.523831	2.26033	0.646581	3.49582	0.000472614	0.00178304	Up
LYPD5	1.95153	2.8334	0.324279	8.73756	2.38201e-18	1.14075e-16	Up
MCEMP1	1.96779	4.22052	0.619041	6.81783	9.24236e-12	1.53275e-10	Up
MDFI	2.52329	2.70082	0.310915	8.68667	3.73218e-18	1.72148e-16	Up
MEDAG	0.545743	2.01507	0.62971	3.2	0.00137426	0.00457755	Up
MEFV	0.946895	2.59794	0.406944	6.38404	1.7248e-10	2.3362e-09	Up
MGAM	0.605495	2.16841	0.571157	3.79651	0.000146747	0.000630406	Up
MIR503HG	0.881672	2.01038	0.35621	5.6438	1.66338e-08	1.59645e-07	Up
MIXL1	0.625033	2.00142	0.358475	5.58314	2.3621e-08	2.20616e-07	Up
MMP1	58.4447	3.97001	0.357826	11.0948	1.32957e-28	2.20885e-26	Up
MMP10	7.85229	5.14697	0.435268	11.8248	2.90514e-32	7.47098e-30	Up
MMP12	75.7602	2.98936	0.231328	12.9226	3.35591e-38	1.6562e-35	Up
MMP3	81.4152	5.41745	0.423125	12.8034	1.56861e-37	7.18232e-35	Up
MMP7	18.5199	7.1927	0.4687	15.3461	3.76306e-53	4.7096e-50	Up
MNDA	11.2031	2.2671	0.21161	10.7136	8.78724e-27	1.19538e-24	Up
MT1JP	1.15985	-2.00304	0.390352	-5.13136	2.8765e-07	2.16783e-06	Down
MT2P1	0.934573	-2.81867	0.876353	-3.21636	0.00129828	0.00435538	Down
NAMPT	86.8235	2.12619	0.191609	11.0965	1.30477e-28	2.187e-26	Up
NAMPTP1	10.0378	2.45144	0.278165	8.81291	1.21939e-18	6.10581e-17	Up
NFE2	0.773841	2.86849	0.590951	4.85402	1.20982e-06	8.10273e-06	Up
NOS2	48.3008	3.5708	0.220641	16.1838	6.56449e-59	9.47962e-56	Up
OLFM4	528.264	3.18508	0.253005	12.589	2.42692e-36	9.90447e-34	Up
OLR1	0.73126	2.32912	0.543718	4.28368	1.83825e-05	9.66113e-05	Up
OR2I1P	7.55029	2.16032	0.246814	8.75282	2.08083e-18	1.00939e-16	Up
OSM	5.64781	5.19709	0.548435	9.47622	2.63668e-21	1.86786e-19	Up
PADI4	0.711938	2.56233	0.514908	4.97629	6.48156e-07	4.58299e-06	Up
PDPN	10.2166	2.80235	0.233585	11.9972	3.67738e-33	1.06208e-30	Up
PDZK1IP1	182.184	2.04277	0.171848	11.8871	1.38136e-32	3.75829e-30	Up
PF4	2.74775	2.63006	0.288211	9.12546	7.14343e-20	4.20388e-18	Up
PI3	755.665	4.08247	0.238012	17.1524	6.03397e-66	1.61822e-62	Up
PLA1A	1.18048	2.38138	0.325165	7.32359	2.41416e-13	5.04689e-12	Up
PLA2G12B	1.26174	-2.22189	0.352296	-6.30688	2.84719e-10	3.72216e-09	Down
PLAU	33.3018	2.06856	0.183356	11.2817	1.61605e-29	2.97433e-27	Up
PLEK	29.7673	2.21893	0.208363	10.6494	1.75576e-26	2.28895e-24	Up
PLEKHN1	0.524187	2.00819	0.40068	5.01196	5.38774e-07	3.86784e-06	Up
PLEKHS1	3.22405	2.3296	0.243536	9.56571	1.11434e-21	8.36777e-20	Up
PRKG2	1.02999	-2.54673	0.385493	-6.60644	3.9367e-11	5.91703e-10	Down
PROC	1.0156	-2.51603	0.325576	-7.72794	1.09302e-14	2.82246e-13	Down
PROK2	4.36326	5.37157	0.640652	8.38453	5.09295e-17	1.95521e-15	Up
PRSS2	4.49899	5.24669	0.567742	9.24133	2.43463e-20	1.51342e-18	Up
PTGS2	5.52802	2.01613	0.335301	6.01288	1.82251e-09	2.07861e-08	Up
REG1A	402.849	7.30097	0.442987	16.4812	5.0049e-61	8.54154e-58	Up
REG1B	77.6315	6.56927	0.573067	11.4633	2.01566e-30	4.15824e-28	Up
REG3A	50.9246	6.10001	0.525458	11.609	3.71134e-31	8.60161e-29	Up
RGS16	1.91042	2.1324	0.311878	6.83728	8.07118e-12	1.35165e-10	Up
RN7SKP127	2.97626	-2.05151	0.387751	-5.2908	1.21782e-07	9.81627e-07	Down
RND1	7.18504	2.67083	0.219702	12.1566	5.29005e-34	1.7734e-31	Up
RNF183	1.31745	3.2845	0.357658	9.18336	4.17837e-20	2.52084e-18	Up
RP11-13K12.1	0.884402	-2.23903	0.345019	-6.48959	8.60689e-11	1.22129e-09	Down
RP11-13K12.5	0.544332	-2.27211	0.421124	-5.39535	6.83915e-08	5.77819e-07	Down
RP11-168F9.2	0.636099	-2.0054	0.328577	-6.10329	1.03909e-09	1.24674e-08	Down
RP11-178L8.8	1.09559	-2.32699	0.816153	-2.85117	0.0043558	0.0124918	Down
RP11-212I21.2	1.03243	2.16052	0.434653	4.97069	6.67142e-07	4.70483e-06	Up
RP11-223C24.1	0.778393	2.69801	0.395147	6.82787	8.61876e-12	1.4344e-10	Up
RP11-245G13.2	0.442211	-2.05426	0.479787	-4.2816	1.85551e-05	9.74362e-05	Down
RP11-294C11.2	25.7737	2.04867	0.23452	8.73561	2.42344e-18	1.1547e-16	Up
RP11-298H24.1	0.895023	-2.15281	0.671347	-3.2067	0.00134267	0.00448824	Down
RP11-350J20.12	0.567647	2.30527	0.492829	4.67761	2.90234e-06	1.79524e-05	Up
RP11-361C13.1	16.9926	2.19795	0.244063	9.00569	2.14317e-19	1.18334e-17	Up
RP11-396O20.2	2.86448	-2.20446	0.316314	-6.96923	3.18681e-12	5.62274e-11	Down
RP11-567C2.1	0.462269	-2.03501	0.38989	-5.21944	1.79465e-07	1.40555e-06	Down
RP11-680F8.1	0.995077	-2.36136	0.296461	-7.96516	1.65005e-15	4.90375e-14	Down
RP11-689B22.2	1.15866	2.2918	0.338135	6.77776	1.22051e-11	1.98035e-10	Up
RP11-731F5.2	535.231	3.2366	0.242954	13.3218	1.72825e-40	9.54249e-38	Up
RP11-812E19.14	1.03842	2.1428	0.55524	3.85924	0.000113741	0.00050159	Up
RP11-95I16.6	0.936069	-2.92499	0.408157	-7.16635	7.70242e-13	1.4907e-11	Down
S100A12	11.9663	6.77396	0.562995	12.032	2.41251e-33	7.07657e-31	Up
S100A3	0.883062	2.23956	0.375111	5.9704	2.36679e-09	2.64474e-08	Up
S100A7	3.74923	5.15116	0.692748	7.43584	1.03906e-13	2.30298e-12	Up
S100A8	115.67	6.8194	0.366665	18.5985	3.30611e-77	6.20656e-73	Up
S100A9	233.542	4.96404	0.288327	17.2167	1.98984e-66	7.47104e-63	Up
SAA1	57.751	7.8384	0.471188	16.6354	3.86182e-62	7.24979e-59	Up
SAA2	27.3237	7.17324	0.42813	16.7548	5.22248e-63	1.22552e-59	Up
SAA2-SAA4	1.8329	4.11826	0.471309	8.73791	2.37468e-18	1.14015e-16	Up
SAA4	0.88509	3.07028	0.562566	5.45763	4.82531e-08	4.22902e-07	Up
SELE	1.74005	3.8735	0.526266	7.36034	1.83442e-13	3.91782e-12	Up
SELP	4.67618	2.04597	0.224108	9.1294	6.88816e-20	4.0664e-18	Up
SERPINA3	14.1972	3.07088	0.311907	9.84549	7.16916e-23	6.31136e-21	Up
SERPINB3	3.91815	5.21659	0.840009	6.21016	5.29303e-10	6.65101e-09	Up
SERPINB4	1.49525	3.82625	0.739047	5.17728	2.25149e-07	1.72872e-06	Up
SERPINB7	8.24491	6.18297	0.607248	10.182	2.38711e-24	2.48963e-22	Up
SERPINE1	5.24283	2.52624	0.339248	7.44657	9.58004e-14	2.12836e-12	Up
SFRP2	0.75076	2.83886	0.834872	3.40036	0.00067298	0.00243897	Up
SGIP1	1.54505	2.21725	0.345781	6.41229	1.43348e-10	1.96537e-09	Up
SIGLEC5	0.694685	2.38221	0.491015	4.8516	1.22468e-06	8.18475e-06	Up
SIRPB1	2.45808	2.67134	0.348493	7.66541	1.78265e-14	4.44432e-13	Up
SLC11A1	4.17181	4.03735	0.440166	9.17232	4.62961e-20	2.77673e-18	Up
SLC26A4	0.920147	3.13024	0.580147	5.3956	6.82957e-08	5.77529e-07	Up
SLC26A4-AS1	0.4998	2.23559	0.548369	4.0768	4.56602e-05	0.000220638	Up
SLC6A14	22.7021	4.71715	0.319825	14.7492	3.11419e-49	3.43898e-46	Up
SLC6A19	4.21743	-2.30498	0.372451	-6.18868	6.06697e-10	7.51288e-09	Down
SLC6A20	1.29048	3.25509	0.384133	8.47385	2.37408e-17	9.73115e-16	Up
SLC7A11	1.13162	2.59032	0.341967	7.57476	3.59794e-14	8.5293e-13	Up
SLC7A5	6.2859	2.09994	0.192905	10.8859	1.3456e-27	1.95821e-25	Up
SNAI1	0.895786	2.06651	0.344772	5.99385	2.04935e-09	2.32181e-08	Up
SNPH	1.57971	2.67369	0.328362	8.1425	3.87206e-16	1.29573e-14	Up
SOCS1	12.9633	2.01603	0.177611	11.3508	7.34543e-30	1.4071e-27	Up
SOCS3	31.2205	2.10703	0.220052	9.57518	1.01681e-21	7.69968e-20	Up
SPP1	10.452	2.5446	0.285184	8.92267	4.55192e-19	2.38696e-17	Up
SPRR1A	0.684276	2.69873	1.1276	2.39335	0.0166954	0.0396286	Up
SPRR1B	3.91423	5.21656	0.722	7.22515	5.00543e-13	1.00071e-11	Up
SPRR2A	0.569351	2.43623	1.04356	2.33454	0.0195675	0.045373	Up
ST6GAL2	1.18983	-2.49435	0.306764	-8.13117	4.25152e-16	1.41263e-14	Down
STC1	1.31758	2.75106	0.495252	5.55487	2.77816e-08	2.55165e-07	Up
STEAP4	1.90136	2.59727	0.375722	6.91274	4.75365e-12	8.20978e-11	Up
STRIP2	0.921287	2.6552	0.374168	7.09627	1.28172e-12	2.38945e-11	Up
TACSTD2	0.915628	3.10787	0.525599	5.91301	3.35905e-09	3.67052e-08	Up
TCN1	4.66157	5.46658	0.51169	10.6834	1.21759e-26	1.62112e-24	Up
TDO2	5.32643	2.07887	0.225528	9.21779	3.03289e-20	1.85461e-18	Up
TGM2	32.0675	2.13068	0.149185	14.2821	2.82805e-46	2.65455e-43	Up
THBS2	0.688755	2.17561	0.549207	3.96137	7.45215e-05	0.000344071	Up
TLR2	2.67246	2.00565	0.270997	7.40098	1.3518e-13	2.9406e-12	Up
TLR8	1.6457	2.35382	0.319123	7.37591	1.63228e-13	3.50604e-12	Up
TNFAIP6	3.19369	2.85029	0.437749	6.51125	7.45287e-11	1.07131e-09	Up
TNFRSF10C	2.83724	4.06492	0.414043	9.81763	9.45367e-23	8.141e-21	Up
TNFRSF6B	44.884	4.31637	0.267922	16.1105	2.15188e-58	2.88551e-55	Up
TNFRSF9	0.985707	2.37741	0.370435	6.41789	1.3818e-10	1.90041e-09	Up
TNFSF9	0.665161	2.22251	0.426351	5.21286	1.85947e-07	1.45207e-06	Up
TNIP3	15.9389	6.6048	0.441469	14.961	1.32093e-50	1.54987e-47	Up
TNNC2	3.12052	-2.49815	0.334596	-7.46616	8.25694e-14	1.8586e-12	Down
TREM1	7.1054	5.53149	0.508617	10.8756	1.50714e-27	2.15981e-25	Up
TREML2	0.552141	2.03433	0.485433	4.19076	2.78021e-05	0.00014053	Up
TSHR	0.665194	2.03256	0.395228	5.14276	2.70731e-07	2.05102e-06	Up
TTR	2.35931	-2.23927	0.268676	-8.33446	7.78524e-17	2.90561e-15	Down
UBD	64.3011	2.06707	0.202792	10.193	2.13022e-24	2.24667e-22	Up
UGT1A1	1.68747	-2.41546	0.371782	-6.49697	8.19535e-11	1.16997e-09	Down
VNN1	17.2741	2.45651	0.300182	8.18339	2.75959e-16	9.48825e-15	Up
VNN2	8.58967	2.04907	0.231269	8.86013	7.99244e-19	4.08834e-17	Up
VNN3	0.52563	2.30658	0.689171	3.34688	0.00081726	0.00290294	Up
VSIG1	1.12853	3.11633	0.50741	6.14163	8.16769e-10	9.93083e-09	Up
WISP1	1.43932	3.60076	0.44351	8.11877	4.70934e-16	1.55102e-14	Up
XKR9	1.203	2.61106	0.337987	7.72535	1.11549e-14	2.86472e-13	Up
XXbac-BPG116M5.17	7.73779	2.4017	0.204516	11.7433	7.64176e-32	1.8631e-29	Up
ZBTB32	0.555714	2.13515	0.410299	5.20389	1.95156e-07	1.51767e-06	Up
ZNF385D	0.625778	2.10074	0.386452	5.43597	5.44987e-08	4.71133e-07	Up
